# Supplementary material for: Reconstruction of the insulin-like signalling pathway of Haemonchus contortus
Source: PubMed Central journal article supplement (PMC4741068; doi:10.1186/s13071-016-1341-8), 2016-02-03
Supplement: 13071_2016_1341_MOESM1_ESM.pdf [file 13071_2016_1341_MOESM1_ESM.pdf]

**Additional file 1: Figure S1 ctd.**

|                    |      |                          |                          |                          |                          |                          |                          |                          |                          |
|--------------------|------|--------------------------|--------------------------|--------------------------|--------------------------|--------------------------|--------------------------|--------------------------|--------------------------|
| <i>Hc</i> -FTT-2   | Coil | G3DSA:1.20.190.20        | PF00244                  | PIRSF000868              | PR00305                  | PS00796                  | PTHR18860                | SM00101                  | SSF48445                 |
|                    |      | <input type="checkbox"/> | <input type="checkbox"/> | <input type="checkbox"/> | <input type="checkbox"/> | <input type="checkbox"/> | <input type="checkbox"/> | <input type="checkbox"/> | <input type="checkbox"/> |
|                    | Coil | G3DSA:1.20.190.20        | PF00244                  | PIRSF000868              | PR00305                  | PS00796                  | PTHR18860                | SM00101                  | SSF48445                 |
| <i>Ce</i> -FTT-2a  |      | <input type="checkbox"/> | <input type="checkbox"/> | <input type="checkbox"/> | <input type="checkbox"/> | <input type="checkbox"/> | <input type="checkbox"/> | <input type="checkbox"/> | <input type="checkbox"/> |
|                    | Coil | G3DSA:1.20.190.20        | PF00244                  |                          | PR00305                  | PS00796                  | PTHR18860                | SM00101                  | SSF48445                 |
| <i>Ce</i> -FTT-2b  |      | <input type="checkbox"/> | <input type="checkbox"/> |                          | <input type="checkbox"/> | <input type="checkbox"/> | <input type="checkbox"/> | <input type="checkbox"/> | <input type="checkbox"/> |
|                    |      |                          |                          |                          |                          |                          |                          |                          |                          |
| <i>Hc</i> -PAR-5   | Coil | G3DSA:1.20.190.20        | PF00244                  | PIRSF000868              | PR00305                  | PS00796                  | PTHR18860                | SM00101                  | SSF48445                 |
|                    |      | <input type="checkbox"/> | <input type="checkbox"/> | <input type="checkbox"/> | <input type="checkbox"/> | <input type="checkbox"/> | <input type="checkbox"/> | <input type="checkbox"/> | <input type="checkbox"/> |
|                    | Coil | G3DSA:1.20.190.20        | PF00244                  | PIRSF000868              | PR00305                  | PS00796                  | PTHR18860                | PTHR18860:SF21           | SM00101                  |
| <i>Ce</i> -PAR-5a  |      | <input type="checkbox"/> | <input type="checkbox"/> | <input type="checkbox"/> | <input type="checkbox"/> | <input type="checkbox"/> | <input type="checkbox"/> | <input type="checkbox"/> | <input type="checkbox"/> |
|                    | Coil | G3DSA:1.20.190.20        | PF00244                  |                          | PR00305                  | PS00797                  | PTHR18860                | PTHR18860:SF21           | SM00101                  |
| <i>Ce</i> -PAR-5b  |      | <input type="checkbox"/> | <input type="checkbox"/> |                          | <input type="checkbox"/> | <input type="checkbox"/> | <input type="checkbox"/> | <input type="checkbox"/> | <input type="checkbox"/> |
|                    |      |                          |                          |                          |                          |                          |                          |                          |                          |
| <i>Hc</i> -DAF-16  |      | G3DSA:1.10.10.10         | PF00250                  | PR00053                  | PS00658                  | PS50039                  | PTHR11829                | PTHR11829:SF113          | SM00339                  |
|                    |      | <input type="checkbox"/> | <input type="checkbox"/> | <input type="checkbox"/> | <input type="checkbox"/> | <input type="checkbox"/> | <input type="checkbox"/> | <input type="checkbox"/> | <input type="checkbox"/> |
|                    |      | G3DSA:1.10.10.10         | PF00250                  | PR00053                  | PS00658                  | PS50039                  | PTHR11829                | PTHR11829:SF113          | SM00339                  |
| <i>Ce</i> -DAF-16a |      | <input type="checkbox"/> | <input type="checkbox"/> | <input type="checkbox"/> | <input type="checkbox"/> | <input type="checkbox"/> | <input type="checkbox"/> | <input type="checkbox"/> | <input type="checkbox"/> |
|                    |      | G3DSA:1.10.10.10         | PF00250                  | PR00053                  | PS00658                  | PS50039                  | PTHR11829                | PTHR11829:SF113          | SM00339                  |
| <i>Ce</i> -DAF-16b |      | <input type="checkbox"/> | <input type="checkbox"/> | <input type="checkbox"/> | <input type="checkbox"/> | <input type="checkbox"/> | <input type="checkbox"/> | <input type="checkbox"/> | <input type="checkbox"/> |
|                    |      | G3DSA:1.10.10.10         | PF00250                  | PR00053                  | PS00658                  | PS50039                  | PTHR11829                | PTHR11829:SF113          | SM00339                  |
| <i>Ce</i> -DAF-16c |      | <input type="checkbox"/> | <input type="checkbox"/> | <input type="checkbox"/> | <input type="checkbox"/> | <input type="checkbox"/> | <input type="checkbox"/> | <input type="checkbox"/> | <input type="checkbox"/> |
|                    |      | G3DSA:1.10.10.10         | PF00250                  | PR00053                  | PS00658                  | PS50039                  | PTHR11829                | PTHR11829:SF113          | SM00339                  |
| <i>Ce</i> -DAF-16d |      | <input type="checkbox"/> | <input type="checkbox"/> | <input type="checkbox"/> | <input type="checkbox"/> | <input type="checkbox"/> | <input type="checkbox"/> | <input type="checkbox"/> | <input type="checkbox"/> |
|                    |      |                          |                          |                          |                          |                          | PTHR11829                | PTHR11829:SF113          |                          |
| <i>Ce</i> -DAF-16e |      |                          |                          |                          |                          |                          | <input type="checkbox"/> | <input type="checkbox"/> |                          |
|                    |      | G3DSA:1.10.10.10         | PF00250                  | PR00053                  | PS00658                  | PS50039                  | PTHR11829                | PTHR11829:SF113          | SM00339                  |
| <i>Ce</i> -DAF-16f |      | <input type="checkbox"/> | <input type="checkbox"/> | <input type="checkbox"/> | <input type="checkbox"/> | <input type="checkbox"/> | <input type="checkbox"/> | <input type="checkbox"/> | <input type="checkbox"/> |
|                    |      | G3DSA:1.10.10.10         | PF00250                  |                          | PS50039                  | PTHR11829                | PTHR11829:SF113          |                          | SSF46785                 |
| <i>Ce</i> -DAF-16g |      | <input type="checkbox"/> | <input type="checkbox"/> | <input type="checkbox"/> | <input type="checkbox"/> | <input type="checkbox"/> | <input type="checkbox"/> | <input type="checkbox"/> | <input type="checkbox"/> |
|                    |      | G3DSA:1.10.10.10         | PF00250                  | PR00053                  | PS00658                  | PS50039                  | PTHR11829                | PTHR11829:SF113          | SM00339                  |
| <i>Ce</i> -DAF-16h |      | <input type="checkbox"/> | <input type="checkbox"/> | <input type="checkbox"/> | <input type="checkbox"/> | <input type="checkbox"/> | <input type="checkbox"/> | <input type="checkbox"/> | <input type="checkbox"/> |
|                    |      | G3DSA:1.10.10.10         | PF00250                  | PR00053                  | PS00658                  | PS50039                  | PTHR11829                | PTHR11829:SF113          | SM00339                  |
| <i>Ce</i> -DAF-16i |      | <input type="checkbox"/> | <input type="checkbox"/> | <input type="checkbox"/> | <input type="checkbox"/> | <input type="checkbox"/> | <input type="checkbox"/> | <input type="checkbox"/> | <input type="checkbox"/> |
|                    |      | G3DSA:1.10.10.10         | PF00250                  | PR00053                  | PS00658                  | PS50039                  | PTHR11829                | PTHR11829:SF113          | SM00339                  |
| <i>Ce</i> -DAF-16k |      | <input type="checkbox"/> | <input type="checkbox"/> | <input type="checkbox"/> | <input type="checkbox"/> | <input type="checkbox"/> | <input type="checkbox"/> | <input type="checkbox"/> | <input type="checkbox"/> |
|                    |      | G3DSA:1.10.10.10         | PF00250                  | PR00053                  | PS00658                  | PS50039                  | PTHR11829                | PTHR11829:SF113          | SM00339                  |
| <i>Ce</i> -DAF-16l |      | <input type="checkbox"/> | <input type="checkbox"/> | <input type="checkbox"/> | <input type="checkbox"/> | <input type="checkbox"/> | <input type="checkbox"/> | <input type="checkbox"/> | <input type="checkbox"/> |
|                    |      | G3DSA:1.10.10.10         | PF00250                  | PR00053                  | PS00658                  | PS50039                  | PTHR11829                | PTHR11829:SF113          | SM00339                  |
| <i>Ce</i> -DAF-16m |      | <input type="checkbox"/> | <input type="checkbox"/> | <input type="checkbox"/> | <input type="checkbox"/> | <input type="checkbox"/> | <input type="checkbox"/> | <input type="checkbox"/> | <input type="checkbox"/> |

**Additional file 1: Figure S1 ctd.**

|                   |                          |                          |                          |                          |                          |                          |                          |
|-------------------|--------------------------|--------------------------|--------------------------|--------------------------|--------------------------|--------------------------|--------------------------|
|                   | G3DSA:1.10.880.10        | PF03131                  | PS00036                  | PTHR26379                | SSF47454                 |                          |                          |
| <i>Hc</i> -SKN-1  | <input type="checkbox"/> | <input type="checkbox"/> | <input type="checkbox"/> | <input type="checkbox"/> | <input type="checkbox"/> |                          |                          |
|                   | G3DSA:1.10.880.10        | PF03131                  | PS00036                  | PTHR26379                | SSF47454                 |                          |                          |
| <i>Ce</i> -SKN-1a | <input type="checkbox"/> | <input type="checkbox"/> | <input type="checkbox"/> | <input type="checkbox"/> | <input type="checkbox"/> |                          |                          |
|                   | G3DSA:1.10.880.10        | PF03131                  | PS00036                  | PTHR26379                | SSF47454                 |                          |                          |
| <i>Ce</i> -SKN-1b | <input type="checkbox"/> | <input type="checkbox"/> | <input type="checkbox"/> | <input type="checkbox"/> | <input type="checkbox"/> |                          |                          |
|                   | G3DSA:1.10.880.10        | PF03131                  | PS00036                  | PTHR26379                | SSF47454                 |                          |                          |
| <i>Ce</i> -SKN-1c | <input type="checkbox"/> | <input type="checkbox"/> | <input type="checkbox"/> | <input type="checkbox"/> | <input type="checkbox"/> |                          |                          |
|                   | G3DSA:1.10.880.10        | PF03131                  | PS00036                  | PTHR26379                | SSF47454                 |                          |                          |
| <i>Ce</i> -SKN-1d | <input type="checkbox"/> | <input type="checkbox"/> | <input type="checkbox"/> | <input type="checkbox"/> | <input type="checkbox"/> |                          |                          |
|                   |                          |                          |                          |                          |                          |                          |                          |
|                   | G3DSA:1.10.10.10         | PF00447                  | PR00056                  | PTHR10015                | SM00415                  | SSF46785                 |                          |
| <i>Hc</i> -HSF-1a | <input type="checkbox"/> | <input type="checkbox"/> | <input type="checkbox"/> | <input type="checkbox"/> | <input type="checkbox"/> | <input type="checkbox"/> |                          |
|                   | G3DSA:1.10.10.10         | PF00447                  | PR00056                  | PTHR10015                | SM00415                  | SSF46785                 |                          |
| <i>Hc</i> -HSF-1b | <input type="checkbox"/> | <input type="checkbox"/> | <input type="checkbox"/> | <input type="checkbox"/> | <input type="checkbox"/> | <input type="checkbox"/> |                          |
|                   | G3DSA:1.10.10.10         | PF00447                  | PR00056                  | PTHR10015                | SM00415                  | SSF46785                 | PTHR10015:SF136          |
| <i>Ce</i> -HSF-1  | <input type="checkbox"/> | <input type="checkbox"/> | <input type="checkbox"/> | <input type="checkbox"/> | <input type="checkbox"/> | <input type="checkbox"/> | <input type="checkbox"/> |
|                   |                          |                          |                          |                          |                          |                          |                          |
|                   | Coil                     | PF06825                  | PTHR19424                | PTHR19424:SF0            |                          |                          |                          |
| <i>Hc</i> -HSB-1  | <input type="checkbox"/> | <input type="checkbox"/> | <input type="checkbox"/> | <input type="checkbox"/> |                          |                          |                          |
|                   | Coil                     | PF06825                  | PTHR19424                | PTHR19424:SF0            |                          |                          |                          |
| <i>Ce</i> -HSB-1  | <input type="checkbox"/> | <input type="checkbox"/> | <input type="checkbox"/> | <input type="checkbox"/> |                          |                          |                          |
|                   |                          |                          |                          |                          |                          |                          |                          |
|                   | Coil                     | PF10152                  | PTHR13015                |                          |                          |                          |                          |
| <i>Hc</i> -DDL-1  | <input type="checkbox"/> | <input type="checkbox"/> | <input type="checkbox"/> |                          |                          |                          |                          |
|                   | Coil                     | PF10152                  | PTHR13015                | PTHR13015:SF0            |                          |                          |                          |
| <i>Ce</i> -DDL-1  | <input type="checkbox"/> | <input type="checkbox"/> | <input type="checkbox"/> | <input type="checkbox"/> |                          |                          |                          |
|                   |                          |                          |                          |                          |                          |                          |                          |
|                   | PF13640                  | PS51471                  | PTHR12907                | SM00702                  |                          |                          |                          |
| <i>Hc</i> -EGL-9a | <input type="checkbox"/> | <input type="checkbox"/> | <input type="checkbox"/> | <input type="checkbox"/> |                          |                          |                          |
|                   | PF13640                  | PS51471                  | PTHR12907                | SM00702                  |                          |                          | SSF51197                 |
| <i>Hc</i> -EGL-9b | <input type="checkbox"/> | <input type="checkbox"/> | <input type="checkbox"/> | <input type="checkbox"/> |                          |                          | <input type="checkbox"/> |
|                   | PF13640                  | PS51471                  | PTHR12907                | SM00702                  |                          |                          | SSF51197                 |
| <i>Hc</i> -EGL-9c | <input type="checkbox"/> | <input type="checkbox"/> | <input type="checkbox"/> | <input type="checkbox"/> |                          |                          | <input type="checkbox"/> |
|                   | PF13640                  | PS51471                  | PTHR12907                | SM00702                  |                          |                          | SSF51197                 |
| <i>Hc</i> -EGL-9d | <input type="checkbox"/> | <input type="checkbox"/> | <input type="checkbox"/> | <input type="checkbox"/> |                          |                          | <input type="checkbox"/> |
|                   | PF13640                  | PS51471                  | PTHR12907                | SM00702                  | PS50865                  | PS01360                  | SSF144232                |
| <i>Ce</i> -EGL-9a | <input type="checkbox"/> | <input type="checkbox"/> | <input type="checkbox"/> | <input type="checkbox"/> | <input type="checkbox"/> | <input type="checkbox"/> | <input type="checkbox"/> |
|                   |                          |                          |                          |                          | PS50865                  | PS01360                  | SSF144232                |
| <i>Ce</i> -EGL-9b |                          |                          |                          |                          | <input type="checkbox"/> | <input type="checkbox"/> | <input type="checkbox"/> |
|                   | PF13640                  | PS51471                  | PTHR12907                | SM00702                  |                          |                          |                          |
| <i>Ce</i> -EGL-9c | <input type="checkbox"/> | <input type="checkbox"/> | <input type="checkbox"/> | <input type="checkbox"/> |                          |                          |                          |
|                   | PF13640                  | PS51471                  | PTHR12907                | SM00702                  | PS50865                  | PS01360                  | SSF144232                |
| <i>Ce</i> -EGL-9d | <input type="checkbox"/> | <input type="checkbox"/> | <input type="checkbox"/> | <input type="checkbox"/> | <input type="checkbox"/> | <input type="checkbox"/> | <input type="checkbox"/> |
|                   | PF13640                  | PS51471                  | PTHR12907                | SM00702                  |                          |                          |                          |
| <i>Ce</i> -EGL-9e | <input type="checkbox"/> | <input type="checkbox"/> | <input type="checkbox"/> | <input type="checkbox"/> |                          |                          |                          |
